# Supplementary material for: Mapping Soluble Guanylyl Cyclase and Protein Disulfide Isomerase Regions of Interaction
Source: PLOS journal article supplement (doi:10.1371/journal.pone.0143523), 2015-11-30
Supplement: S1 (10.1371/journal.pone.0143523.s001) [file journal.pone.0143523.s001]

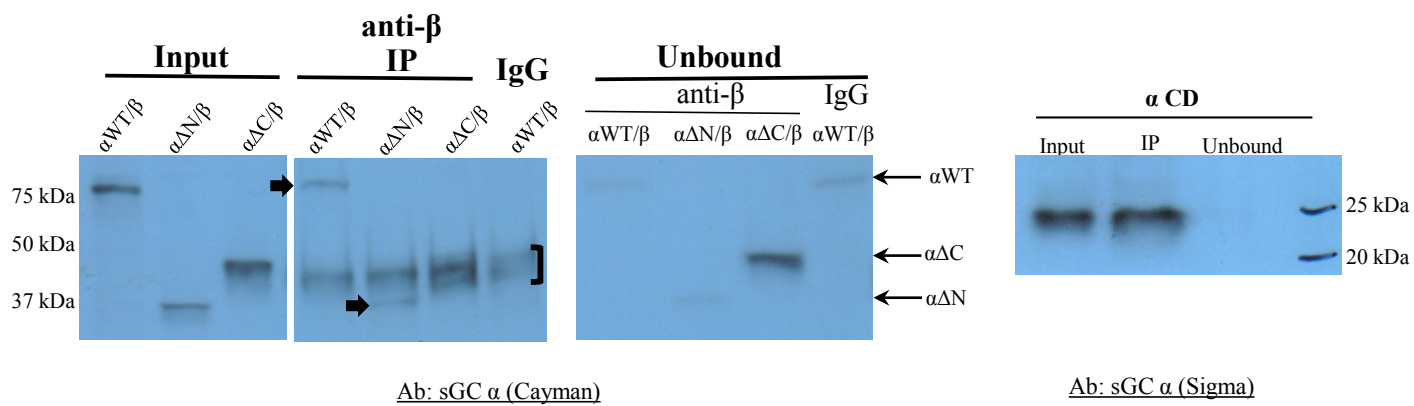

**S1 Fig : All  $\alpha$  sGC domain constructs that IP with PDI also IP with the  $\beta$  subunit.**

COS-7 cells were co-transfected with each  $\alpha$  construct and  $\beta$  WT. Anti-sGC  $\beta$  was used to co-immunoprecipitate  $\alpha$  WT and the three  $\alpha$  domain constructs  $\alpha$  $\Delta$ N (lacking the N-terminal domain),  $\alpha$  $\Delta$ C (lacking the C-terminal domain) and  $\alpha$  catalytic domain ( $\alpha$  CD that expresses only the catalytic domain). Anti- $\beta$  antibodies pull down the  $\alpha$  WT construct,  $\alpha$  $\Delta$ N (black arrows IP panel) and  $\alpha$  CD (right panel) but not the  $\alpha$  C-terminal deletion construct, as confirmed by the unbound fraction that shows a strong signal for  $\alpha$  $\Delta$ C (e.g. no pull-down). These data suggest that the catalytic C-term domain of  $\alpha$  is required for heterodimerization and for interaction with PDI. Control for specificity of IP was IgG. The bracket indicates IgG signals. Two different antibodies have to be used to detect  $\alpha$  construct (from Cayman and Sigma).
